# Supplementary material for: Effects of bioformulation prototype and bioactive extracts from Agaricus bisporus spent mushroom substrate on controlling Rhizoctonia solani of Lactuca sativa L
Source: Frontiers journal article supplement (doi:10.3389/fpls.2024.1466956), 2024-10-24

**Supplementary material S2.** Leaves (1) and roots (2) of lettuce plants treated with water (A), AP1OD formulation (B) and *Agaricus bisporus* WWE (C) and HWE (D).

1)


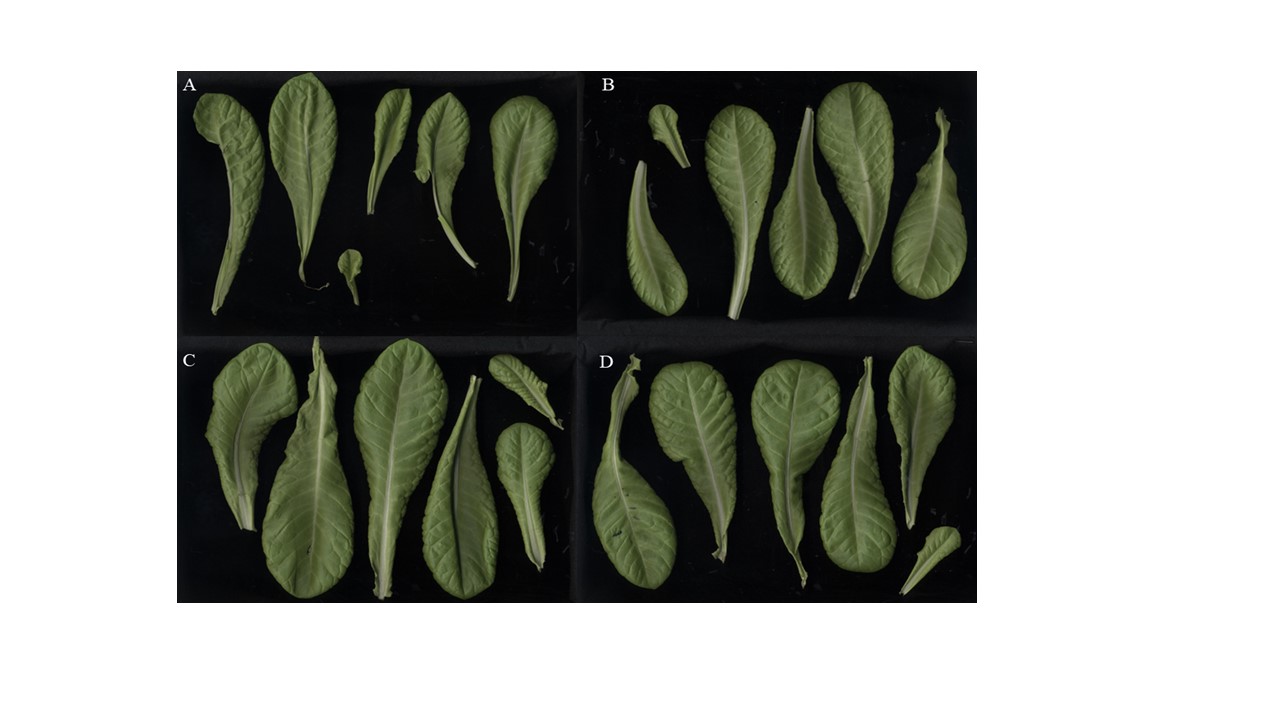


2)


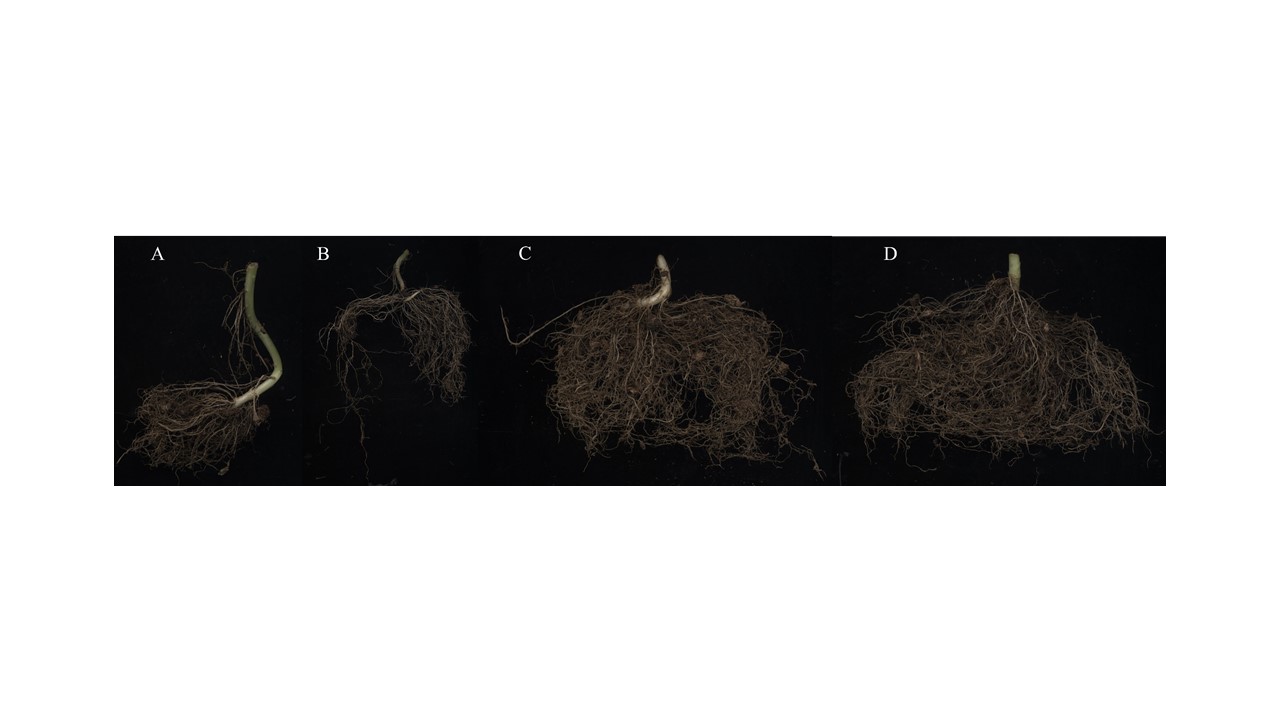

Supplement: Table_2.DOCX [file Table_2.DOCX]
